# Supplementary material for: Palmitate Impairs and Eicosapentaenoate Restores Insulin Secretion Through Regulation of SREBP-1c in Pancreatic Islets
Source: Oxford University Press journal article supplement (doi:10.2337/db06-1806), 2008-05-06
Supplement: db061806-sup-suppltable.doc [file db061806-sup-suppltable.doc]

**On-line Only Appendix Table 1**

|  |  | Palmitate-rich | Palmitate-rich diet |
| --- | --- | --- | --- |
|  | Control diet |  |  |
|  |  | diet | + 5% EPA-E |
| Body weight (g) | 23.4 ± 0.3 | 23.3 ± 0.3 | 23.4 ± 0.4 |
| Food intake (g/day) | 3.42 ± 0.83 | 3.21 ± 0.57 | 3.77 ± 0.76 |

Insulin (ng/mL) 0.26 ± 0.02* 0.18 ± 0.02 0.28 ± 0.04** Glucose (mg/dL) 92 ± 6* 136 ± 8 122 ± 9* Triglyceride (mg/dL) 112 ± 8 135 ± 6 81 ± 11** Total cholesterol (mg/dL) 89 ± 6 97 ± 14 64 ± 3* NEFA (mEq/L) 0.81 ± 0.04 0.93 ± 0.15 0.78 ± 0.09

Values are expressed as mean ± S.E.M. Statistic analysis were performed using one-way ANOVA followed by Dunnett’s procedure, ** p < 0.01 and * p < 0.05 (versus PA rich diet group), respectively. NEFA : non-esterified fatty acid.

**On-line only Appendix Table 2**

Body weight, food intake and plasma parameters of EPA-E administrated KK-Ay mice

| C57BL/6 | | | | KK-Ay | | | KK-Ay | | |
| --- | --- | --- | --- | --- | --- | --- | --- | --- | --- |
| -vehicle | | | | -vehicle | | | -EPA-E | | |
| Body weight (g) | 28.3 | ± | 2.9 | 38.5 | ± | 4.2 | 37.2 | ± | 2.9 |
| Food intake (g/day) | 3.17 | ± | 0.70* | 6.44 | ± | 1.72 | 6.23 | ± | 1.20 |

Insulin (ng/mL) 0.32 ± 0.22* 1.82 ± 1.06 1.91 ± 1.01

Glucose (mg/dL) 149 ± 24* 179 ± 40 168 ± 38 Triglyceride (mg/dL) 61 ± 10* 182 ± 50 222 ± 99 Total cholesterol (mg/dL) 122 ± 11 136 ± 10 147 ± 29

NEFA (mEq/L) 1.44 ± 0.20 1.20 ± 0.32 1.01 ± 0.16

Values are expressed as mean ± S.E.M. Statistic analysis were performed using one-way ANOVA followed by Dunnett’s procedure, ** p < 0.01 and * p < 0.05 (versus KK-Ay vehicle group), respectively. NEFA : non-esterified fatty acid.

**On-line only Appendix Table 3**

Sequences of Real Time PCR primers

| Gene | Primers |
| --- | --- |
| SREBP-1a | 5’-AGGCGGCTCTGGAACAGA-3’ |
|  | 3’-TCAAAACCGCTGTGTCCAGTT-5’ |
| SREBP-1c | 5’-CGGCGCGGAAGCTGT-3’ |
|  | 3’-TGCAATCCATGGCTCCGT-5’ |
| FAS | 5’-ATCCTGGAACGAGAACACGATCT-3’ |
|  | 3’-AGAGACGTGTCACTCCTGGACTT-5’ |
| ELOVL-6 | 5’-AAGAACCTGACTCACTAGCA-3’ |
|  | 3’-TGTTGTGAGATAAGCACTTGA-5’ |
| SCD-1 | 5’-AGATCTCCAGTTCTTACACGACCAC-3’ |
|  | 3’-CTTTCATTTCAGGACGGATGTCT-5’ |
| IRS-2 | 5’-AGTCCCACATCGGGCTTGAAG-3’ |
|  | 3’-GGTCTGCACGGATGACCTTAG-5’ |
| UCP-2 | 5’-GACCTCATCAAAGATACTCTCCTGAA-3’ |
|  | 3’-ATCTCGTCTTGACCACATCAACAG-5’ |
| Granuphilin | 5’-CCAGCACACAAAGGCGAGT-3’ |
|  | 3’-GAAGGAGGTATCCCTTGACAAAG-5’ |
| Cyclophilin | 5’-TGGCTCACAGTTCTTCATAACCA-3’ |
|  | 3’-ATGACATCCTTCAGTGGCTTGTC-5’ |

On-line only Appendix RESEARCH DESIGN and METHODS

**Palmitate Rich Diet Study.**

Male C57BL/6 mice at 8-weeks of age were placed on fish oil-free-F1 diet (Funabashi Farm, Chiba, Japan) as control diet for the adaptation period. Each group of 5 animals was fed with free access to control diet, Tripalmitin (control diet containing 20% tripalmitin (Wako Chemicals, Osaka, Japan)) or Tripalmitin + EPA-E (20% tripalmitin plus 5% ethyl eicosapentaenoate (EPA-E, Mochida pharmaceutical), respectively for 28 days. Tripalmitin powdered by mixer and EPA-E were admixed into control diets by weight. After 28 days, blood samples were obtained in fed-state mice under ansthesia, and plasma were separated by centrification at 4ºC. Plasma parameters (insulin glucose, triglyceride, total cholesterol, and NEFA (non-esterified fatty acid)) were determined by an insulin ELISA kit, and with commercial kits (Wako Chemicals, Osaka, Japan), respectively, according to the manufacturer’s instructions. The pancreatic islets were isolated by collagenase digestion methods as described in RESEARCH DESIGN and METHODS. Hand-picked islets were kept at 37°C in islets culture medium (RPMI-1640 medium supplemented with 10% fetal calf serum, 0.5% bovine serum albumin (BSA), 100 units/mL penicillin and 100 µg/mL streptomycin as antibiotics) prior to the experiments. For estimation of glucose stimulated insulin secretion (GSIS), batches of 10 islets of similar size were incubated for 30 min in 1 mL Krebs-Ringer bicarbonate buffer (KRBH) pH 7.4 containing 0.5% BSA at 2.8 mM glucose for 30 min. After islets were replaced with KRBH containing 20 mM glucose or alternatively 30 mM KCl + 2.8 mM glucose to estimate insulin secretion, were incubated for 30 min. At the end of each incubation period, medium was collected and insulin extraction from remaining islets was performed with acidic ethanol (0.2 mol/L HCl in 75% ethanol), and stored at -70°C until assay. Insulin concentration was measured by insulin ELISA. Hoechst-33258 staining to sonicated islets was performed to determine the islets DNA contents. Total RNAs were immediately extracted from isolated islets by Trizol reagent and stored at -70°C until real-time quantitative PCR.

**KK-Ay mice Study.**

Male KK-Ay mice and C57BL/6 mice as normal control at 8-weeks of age were placed on free access to fish oil-free-F1-diet for one week for adaptation and for all experimental periods. After KK-Ay mice were divided to two groups, one group of 9-10 mice was orally administrated by gavage at a dose of EPA-E (1 g/kg/day) for 28 days. Other group was administrated 5% gum arabic solution alone. EPA-E was suspended into 5% gum arabic solution by polytron homogenaizer and sonication. After 28 days, blood samples and pancreatic islets were obtained in fed-state mice under ansthesia. As the same procedure described in Palmitate-rich diet study, plasma parameters were measured, and GSIS from isolated islets and real-time quantitative PCR were performed.
